# Supplementary material
Source: ML conference proceedings conference paper supplement (https://proceedings.mlr.press/v108/wolfer20a.html)
Supplement: Supplementary file [file wolfer20a-supp.pdf]

## A Proof of Theorem 4.3, lower bound in $\Omega(dt_{\text{mix}})$ .

Let us recall the construction of Wolfer and Kontorovich (2019). Taking  $0 < \varepsilon \leq 1/8$  and  $d = 6k$ ,  $k \geq 2$  fixed,  $0 < \eta < 1/48$  and  $\tau \in \{0, 1\}^{d/3}$ , we define the block matrix

$$\mathbf{M}_{\eta, \tau} = \begin{pmatrix} C_\eta & R_\tau \\ R_\tau^\top & L_\tau \end{pmatrix},$$

where  $C_\eta \in \mathbb{R}^{d/3 \times d/3}$ ,  $L_\tau \in \mathbb{R}^{2d/3 \times 2d/3}$ , and  $R_\tau \in \mathbb{R}^{d/3 \times 2d/3}$  are given by

$$L_\tau = \frac{1}{8} \text{diag} (7 - 4\tau_1\varepsilon, 7 + 4\tau_1\varepsilon, \dots, 7 - 4\tau_{d/3}\varepsilon, 7 + 4\tau_{d/3}\varepsilon),$$

$$C_\eta = \begin{pmatrix} \frac{3}{4} - \eta & \frac{\eta}{d/3-1} & \cdots & \frac{\eta}{d/3-1} \\ \frac{\eta}{d/3-1} & \frac{3}{4} - \eta & \ddots & \vdots \\ \vdots & \ddots & \ddots & \frac{\eta}{d/3-1} \\ \frac{\eta}{d/3-1} & \cdots & \frac{\eta}{d/3-1} & \frac{3}{4} - \eta \end{pmatrix},$$

$$R_\tau = \frac{1}{8} \begin{pmatrix} 1 + 4\tau_1\varepsilon & 1 - 4\tau_1\varepsilon & 0 & \cdots & \cdots & \cdots & 0 \\ 0 & 0 & 1 + 4\tau_2\varepsilon & 1 - 4\tau_2\varepsilon & 0 & \cdots & 0 \\ \vdots & \vdots & \vdots & \vdots & \vdots & \vdots & \vdots \\ 0 & \cdots & \cdots & \cdots & 0 & 1 + 4\tau_{d/3}\varepsilon & 1 - 4\tau_{d/3}\varepsilon \end{pmatrix}.$$

Holding  $\eta$  fixed, define the collection

$$\mathcal{H}_\eta = \left\{ \mathbf{M}_{\eta, \tau} : \tau \in \{0, 1\}^{d/3} \right\} \quad (\text{A.1})$$

of ergodic and symmetric stochastic matrices. Suppose that  $\mathbf{X} = (X_1, \dots, X_m) \sim (\mathbf{M}, \boldsymbol{\mu})$ , where  $\mathbf{M} \in \mathcal{H}_\eta$ , and  $\boldsymbol{\mu}$  is the uniform distribution over the inner clique nodes, indexed by  $\{1, \dots, d/3\}$ . Define the random variable  $T_{\text{CLIQ}/2}$  to be the first time some half of the states in the inner clique were visited,

$$T_{\text{CLIQ}/2} = \inf \{t \geq 1 : |\{X_1, \dots, X_t\} \cap [d/3]| = d/6\}. \quad (\text{A.2})$$

Lemma B.5 lower bounds the half cover time:

$$m \leq \frac{d}{120\eta} \implies \mathbf{P}(T_{\text{CLIQ}/2} > m) \geq \frac{1}{5}, \quad (\text{A.3})$$

while Wolfer and Kontorovich (2019, Lemma 6) establishes the key property that any element  $\mathbf{M}$  of  $\mathcal{H}_\eta$  satisfies

$$t_{\text{mix}}(\mathbf{M}) = \tilde{\Theta}(1/\eta). \quad (\text{A.4})$$

Let us fix some  $i_\star \in [d]$ , choose as reference  $\overline{\mathbf{M}} \doteq \mathbf{M}_{\eta, \mathbf{0}}$  and as an alternative hypothesis  $\mathbf{M} \doteq \mathbf{M}_{\eta, \tau}$ , with  $\tau_{i_\star} = \mathbf{1}\{i = i_\star\}$ . Take both chains to have the uniform distribution  $\boldsymbol{\mu}$  over the clique nodes as their initial one. It is easily verified that  $\|\overline{\mathbf{M}} - \mathbf{M}\| = \varepsilon$ , so that

$$\mathcal{R}_m \geq \inf_{\mathcal{T}} \left[ \mathbf{P}_0(\mathcal{T} = 1 | T_{\text{CLIQ}/2} > m) \mathbf{P}_0(T_{\text{CLIQ}/2} > m) + \mathbf{P}_1(\mathcal{T} = 0 | T_{\text{CLIQ}/2} > m) \mathbf{P}_1(T_{\text{CLIQ}/2} > m) \right]. \quad (\text{A.5})$$

Further, for  $m < \frac{d}{120\eta}$ , we have

$$\mathcal{R}_m \geq \frac{1}{5} \inf_{\mathcal{T}} \left[ \mathbf{P}_0(\mathcal{T} = 1 | T_{\text{CLIQ}/2} > m) + \mathbf{P}_1(\mathcal{T} = 0 | T_{\text{CLIQ}/2} > m) \right]. \quad (\text{A.6})$$

Since  $\mathbf{P}(X|Y) \geq \mathbf{P}(X|Y, Z) \mathbf{P}(Z|Y)$ , we have

$$\mathbf{P}_0(\mathcal{T} = 1 | T_{\text{CLIQ}/2} > m) \geq \mathbf{P}_0(\mathcal{T} = 1 | T_{\text{CLIQ}/2} > m, N_{i_\star} = 0) \mathbf{P}_0(N_{i_\star} = 0 | T_{\text{CLIQ}/2} > m). \quad (\text{A.7})$$

Additionally, the symmetry of our reference chain implies that  $\mathbf{P}_0(N_{i_\star} = 0 | T_{\text{CLIQ}/2} > m) \geq 1/2$ . It follows, via an analogous argument that  $\mathbf{P}_1(N_{i_\star} = 0 | T_{\text{CLIQ}/2} > m) \geq 1/2$ , so that

$$\mathcal{R}_m \geq \frac{1}{10} \inf_{\mathcal{T}} [\mathbf{P}_0(\mathcal{T} = 1 | T_{\text{CLIQ}/2} > m, N_{i_\star} = 0) + \mathbf{P}_1(\mathcal{T} = 0 | T_{\text{CLIQ}/2} > m, N_{i_\star} = 0)]. \quad (\text{A.8})$$

By Le Cam's theorem (Le Cam, 2012, Chapter 16, Section 4),

$$\mathcal{R}_m \geq \frac{1}{10} [1 - \|\mathbf{P}_0(\mathbf{X} | T_{\text{CLIQ}/2} > m, N_{i_\star} = 0) - \mathbf{P}_1(\mathbf{X} | T_{\text{CLIQ}/2} > m, N_{i_\star} = 0)\|_{\text{TV}}]. \quad (\text{A.9})$$

Other than state  $i_\star$  and its connected outer nodes, the reference chain  $\mathbf{M}_{\eta,0}$  and the alternative chain  $\mathbf{M}_{\eta,\tau}$  are identical. Conditional on  $N_{i_\star} = 0$ , the outer states connected to  $i_\star$  were never visited, since these are only connected to the rest of the chain via  $i_\star$  and our choice of the initial distribution  $\boldsymbol{\mu}$  constrains the initial state to the inner clique. Thus, the two distributions over sequences conditioned on  $N_{i_\star} = 0$  are identical, causing the term  $\|\mathbf{P}_0(\cdot) - \mathbf{P}_1(\cdot)\|_{\text{TV}}$  in (A.9) to vanish:

$$\mathcal{R}_m \geq \frac{1}{10}, \quad (\text{A.10})$$

which proves a sample complexity lower bound of  $\tilde{\Omega}(dt_{\text{mix}})$ . Since our family of Markov chains has uniform stationary distribution ( $\pi_\star = 1/d$ ), this further proves that the dependence on  $\pi_\star$  in our bound is in general not improvable.  $\square$

## B Auxiliary lemmas

The following standard combinatorial fact will be useful.

**Lemma B.1** *Let  $(m, n) \in \mathbb{N}^2$  such that  $m + 1 \geq 2n$ . Then there are  $\binom{m-n+1}{n}$  ways of selecting  $n$  non-consecutive integers from  $[m]$ .*

**Lemma B.2** *For any  $\mathbf{M} \in \mathcal{G}_{p_\star}$  defined in (6.3), started with initial distribution  $\mathbf{p}$  defined in (6.5),*

$$P(m, n, p_\star) \doteq \mathbf{P}_{\mathbf{M}, \mathbf{p}}(N_{d+1} = n) = \begin{cases} (1 - p_\star)^n & \text{if } n = 0 \\ p_\star^n (1 - p_\star)^{m-2n} \left[ \binom{m-n+1}{n} - \binom{m-n}{n-1} p_\star \right] & \text{if } 1 \leq n \leq \frac{m+1}{2} \\ 0 & \text{if } n > \frac{m+1}{2} \end{cases}.$$

**Proof:** For any  $\mathbf{M} \in \mathcal{G}_{p_\star}$ , we construct the following associated two-state Markov chain, with initial distribution  $(1 - p_\star, p_\star)$ , where all states  $i \in [d]$  are merged into a single state, which we call  $\overline{d+1}$ , while state  $d+1$  is kept distinct. Observe that this two-state Markov chain is the same for all  $\mathbf{M} \in \mathcal{G}_{p_\star}$ , regardless of  $\boldsymbol{\eta}$ , and that the probability distribution of the number of visits to state  $d+1$ , when sampling from  $\mathbf{M}$ , is the same as when sampling from this newly constructed chain.

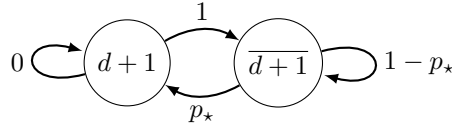

Let  $m \geq 1$ . The case where  $n = 0$  is trivial as it corresponds to  $n$  failures to reach the state  $d+1$ , and there is only one such path. When  $n > \frac{m+1}{2}$ , there is no path of length  $m$  that contains  $n$  visits to state  $d+1$ , as any visit to this state almost surely cannot be directly followed by another visit to this same state. It remains to analyze the final case where  $1 \leq n \leq \frac{m+1}{2}$ . Take  $(x_1, \dots, x_m)$  to be a sample path in which the state  $d+1$  was visited  $n$  times. We consider two sub-cases.

**The last state in the sample path is  $d+1$ :** In the case where  $x_m = d+1$ , note that also necessarily  $x_{m-1} = \overline{d+1}$ . The  $n-1$  previous visits to state  $d+1$  were followed by a probability 1 transition to state  $\overline{d+1}$ , and the remaining transitions have value  $1 - p_\star$ , so that  $\mathbf{P}(\mathbf{X} = \mathbf{x}) = p_\star^{n-1} 1^{n-1} (1 - p_\star)^{m-(n-1)-(n-1)-1} p_\star =$

$p_\star^n(1-p_\star)^{m-2n+1}$ . Since the last two states in the sequence are fixed and known,  $x_m = d+1$ ,  $x_{m-1} = \overline{d+1}$ , counting the number of such paths amounts to counting the number of subsets of  $m-2$  of size  $n-1$  such that no two elements are consecutive, i.e.  $\binom{(m-2)-(n-1)+1}{n-1} = \binom{m-n}{n-1}$  (Lemma B.1).

**The last state in the sample path is  $\overline{d+1}$ :** By reasoning similar to above, such paths have probability  $p_\star^n(1-p_\star)^{m-2n}$ . To count such paths, consider all possible subsets of  $m$  of size  $n$  such that no two elements are consecutive, and subtract the count of paths in the other case where the last state was  $d+1$ . There are then  $\binom{m-n+1}{n} - \binom{m-n}{n-1} = \binom{m-n}{n}$  such paths.

It follows that

$$\begin{aligned} P(m, n, p_\star) &= \binom{m-n}{n-1} p_\star^n (1-p_\star)^{m-2n+1} + \binom{m-n}{n} p_\star^n (1-p_\star)^{m-2n} \\ &= p_\star^n (1-p_\star)^{m-2n} \left[ \binom{m-n+1}{n} - \binom{m-n}{n-1} p_\star \right]. \end{aligned} \tag{B.1}$$

□

**Lemma B.3** Let  $M_1, M_2 \in \mathcal{G}_{p_\star}$ , defined in (6.3), and start both chains with initial distribution  $\mathbf{p}$  defined in (6.5). For arbitrary  $(m, n) \in \mathbb{N}^2$  such that  $m+1 \geq 2n$ , let  $N_{d+1} = \sum_{t=1}^m \mathbf{1}\{X_t = d+1\}$  be the number of visits to state  $(d+1)$ . Then, for trajectories  $\mathbf{X} = (X_1, \dots, X_m)$  sampled from either chain, we have

$$\begin{aligned} &\|\mathbf{P}_{M_1}(\mathbf{X} \mid N_{d+1} \leq n) - \mathbf{P}_{M_2}(\mathbf{X} \mid N_{d+1} \leq n)\|_{\text{TV}} \\ &\leq \|\mathbf{P}_{M_1}(\mathbf{X} \mid N_{d+1} = n) - \mathbf{P}_{M_2}(\mathbf{X} \mid N_{d+1} = n)\|_{\text{TV}}. \end{aligned} \tag{B.2}$$

**Proof:** Partitioning over all possible number of visits to  $d+1$  for  $M_1$ ,

$$\begin{aligned} \mathbf{P}_{M_1}(\mathbf{X} \mid N_{d+1} \leq n) &= \sum_{k=0}^{\infty} \mathbf{P}_{M_1}(\mathbf{X} \mid N_{d+1} \leq n, N_{d+1} = k) \mathbf{P}_{M_1}(N_{d+1} = k \mid N_{d+1} \leq n) \\ &= \sum_{k=0}^n \mathbf{P}_{M_1}(\mathbf{X} \mid N_{d+1} = k) \mathbf{P}_{M_1}(N_{d+1} = k \mid N_{d+1} \leq n) \\ &= \sum_{k=0}^n \mathbf{P}_{M_1}(\mathbf{X} \mid N_{d+1} = k) \frac{\overbrace{\mathbf{P}_{M_1}(N_{d+1} \leq n \mid N_{d+1} = k)}^{=1} \mathbf{P}_{M_1}(N_{d+1} = k)}{\mathbf{P}_{M_1}(N_{d+1} \leq n)} \end{aligned} \tag{B.3}$$

From Lemma B.2, we have

$$\begin{aligned} \mathbf{P}_{M_1}(N_{d+1} = k) &= \mathbf{P}_{M_2}(N_{d+1} = k) = P(m, k, p_\star) \\ \mathbf{P}_{M_1}(N_{d+1} \leq n) &= \mathbf{P}_{M_2}(N_{d+1} \leq n) = \sum_{s=0}^n P(m, s, p_\star), \end{aligned} \tag{B.4}$$

and subsequently,

$$\begin{aligned} &\|\mathbf{P}_{M_1}(\mathbf{X} \mid N_{d+1} \leq n) - \mathbf{P}_{M_2}(\mathbf{X} \mid N_{d+1} \leq n)\|_{\text{TV}} \\ &= \left\| \sum_{k=0}^n \left( \mathbf{P}_{M_1}(\mathbf{X} \mid N_{d+1} = k) - \mathbf{P}_{M_2}(\mathbf{X} \mid N_{d+1} = k) \right) \frac{P(m, k, p_\star)}{\sum_{s=0}^n P(m, s, p_\star)} \right\|_{\text{TV}} \\ &\leq \sum_{k=0}^n \|\mathbf{P}_{M_1}(\mathbf{X} \mid N_{d+1} = k) - \mathbf{P}_{M_2}(\mathbf{X} \mid N_{d+1} = k)\|_{\text{TV}} \frac{P(m, k, p_\star)}{\sum_{s=0}^n P(m, s, p_\star)} \\ &\leq \max_{k \in \{0, \dots, n\}} \|\mathbf{P}_{M_1}(\mathbf{X} \mid N_{d+1} = k) - \mathbf{P}_{M_2}(\mathbf{X} \mid N_{d+1} = k)\|_{\text{TV}} \\ &\leq \|\mathbf{P}_{M_1}(\mathbf{X} \mid N_{d+1} = n) - \mathbf{P}_{M_2}(\mathbf{X} \mid N_{d+1} = n)\|_{\text{TV}}. \end{aligned} \tag{B.5}$$

□

The following lemma shows that for the family  $\mathcal{G}_{p_\star}$  of chains constructed in (6.3), conditioned on the number of visits to state  $d+1$ , it is possible to control the total variation between two trajectories drawn from two chains of the class in terms of the total variation between product distributions.

**Lemma B.4** *Let  $M_{\eta_1}, M_{\eta_2} \in \mathcal{G}_{p_\star}$  defined in (6.3), both started with initial distribution  $\mathbf{p}$  defined in (6.5). Then, for  $1 \leq n \leq \frac{m+1}{2}$ ,*

$$\|\mathbf{P}_{M_{\eta_1}}(\mathbf{X}|N_{d+1}=n) - \mathbf{P}_{M_{\eta_2}}(\mathbf{X}|N_{d+1}=n)\|_{\text{TV}} \leq \|\boldsymbol{\eta}_1^{\otimes n} - \boldsymbol{\eta}_2^{\otimes n}\|_{\text{TV}}. \quad (\text{B.6})$$

**Proof:** Total variation and  $\ell_1$  norm are equal up to a conventional factor of 2,

$$\begin{aligned} & 2 \|\mathbf{P}_{M_{\eta_1}}(\mathbf{X}|N_{d+1}=n) - \mathbf{P}_{M_{\eta_2}}(\mathbf{X}|N_{d+1}=n)\|_{\text{TV}} \\ &= \sum_{\mathbf{x}=(x_1, \dots, x_m) \in [d+1]^m} |\mathbf{P}_{M_{\eta_1}}(\mathbf{X}=\mathbf{x}|N_{d+1}=n) - \mathbf{P}_{M_{\eta_2}}(\mathbf{X}=\mathbf{x}|N_{d+1}=n)|. \end{aligned} \quad (\text{B.7})$$

Notice now that

$$\begin{aligned} \mathbf{P}_{M_{\eta_1}}(\mathbf{X}=\mathbf{x}|N_{d+1}=n) &= \frac{\mathbf{P}_{M_{\eta_1}}(N_{d+1}=n|\mathbf{X}=\mathbf{x}) \mathbf{P}_{M_{\eta_1}}(\mathbf{X}=\mathbf{x})}{\mathbf{P}_{M_{\eta_1}}(N_{d+1}=n)} \\ &= \frac{\mathbf{1}\{n_{d+1}=n\} \mathbf{P}_{M_{\eta_1}}(\mathbf{X}=\mathbf{x})}{\mathbf{P}_{M_{\eta_1}}(N_{d+1}=n)}, \end{aligned} \quad (\text{B.8})$$

and similarly for  $M_{\eta_2}$ , so that

$$\begin{aligned} & 2 \|\mathbf{P}_{M_{\eta_1}}(\mathbf{X}|N_{d+1}=n) - \mathbf{P}_{M_{\eta_2}}(\mathbf{X}|N_{d+1}=n)\|_{\text{TV}} \\ &= \sum_{\mathbf{x} \in [d+1]^m} \left| \frac{\mathbf{1}\{n_{d+1}=n\} \mathbf{P}_{M_{\eta_1}}(\mathbf{X}=\mathbf{x})}{\mathbf{P}_{M_{\eta_1}}(N_{d+1}=n)} - \frac{\mathbf{1}\{n_{d+1}=n\} \mathbf{P}_{M_{\eta_2}}(\mathbf{X}=\mathbf{x})}{\mathbf{P}_{M_{\eta_2}}(N_{d+1}=n)} \right|. \end{aligned} \quad (\text{B.9})$$

Invoking Lemma B.2, write

$$P(m, n, p_\star) = \mathbf{P}_{M_{\eta_1}}(N_{d+1}=n) = \mathbf{P}_{M_{\eta_2}}(N_{d+1}=n).$$

For  $1 \leq n \leq \frac{m+1}{2}$ ,

$$\begin{aligned} & 2 \|\mathbf{P}_{M_{\eta_1}}(\mathbf{X}|N_{d+1}=n) - \mathbf{P}_{M_{\eta_2}}(\mathbf{X}|N_{d+1}=n)\|_{\text{TV}} \\ &= \frac{1}{P(m, n, p_\star)} \sum_{\mathbf{x} \in [d+1]^m} \mathbf{1}\{n_{d+1}=n\} |\mathbf{P}_{M_{\eta_1}}(\mathbf{X}=\mathbf{x}) - \mathbf{P}_{M_{\eta_2}}(\mathbf{X}=\mathbf{x})| \\ &= \frac{1}{P(m, n, p_\star)} \left( \sum_{\substack{\mathbf{x} \in [d+1]^m \\ n_{d+1}=n \\ x_m=d+1}} |\mathbf{P}_{M_{\eta_1}}(\mathbf{X}=\mathbf{x}) - \mathbf{P}_{M_{\eta_2}}(\mathbf{X}=\mathbf{x})| \right. \\ & \quad \left. + \sum_{\substack{\mathbf{x} \in [d+1]^m \\ n_{d+1}=n \\ x_m \neq d+1}} |\mathbf{P}_{M_{\eta_1}}(\mathbf{X}=\mathbf{x}) - \mathbf{P}_{M_{\eta_2}}(\mathbf{X}=\mathbf{x})| \right). \end{aligned} \quad (\text{B.10})$$

Recall that it is impossible to visit state  $d + 1$  twice in a row. Computing the first sum,

$$\begin{aligned}
 & \sum_{\substack{\mathbf{x} \in [d+1]^m \\ n_{d+1} = n \\ x_m = d+1}} |\mathbf{P}_{M_{\eta_1}}(\mathbf{X} = \mathbf{x}) - \mathbf{P}_{M_{\eta_2}}(\mathbf{X} = \mathbf{x})| \\
 &= \sum_{\substack{S = (s_1, \dots, s_n) \\ S \subset [m] \\ s_n = m \\ i \neq j \Rightarrow |s_i - s_j| > 1}} \sum_{(x_{s_1}, \dots, x_{s_{n-1}}) \in [d+1]^{n-1}} d^{m-2n+1} p_\star^n \left( \frac{1-p_\star}{d} \right)^{m-2n+1} \left| \prod_{k=1}^{n-1} \boldsymbol{\eta}_1(x_{s_k}) - \prod_{k=1}^{n-1} \boldsymbol{\eta}_2(x_{s_k}) \right| \\
 &= \binom{(m-2) - (n-1) + 1}{n-1} p_\star^n (1-p_\star)^{m-2n+1} \sum_{(x_{s_1}, \dots, x_{s_{n-1}}) \in [d]^{n-1}} \left| \prod_{k=1}^{n-1} \boldsymbol{\eta}_1(x_{s_k}) - \prod_{k=1}^{n-1} \boldsymbol{\eta}_2(x_{s_k}) \right| \\
 &= \binom{m-n}{n-1} p_\star^n (1-p_\star)^{m-2n+1} 2 \|\boldsymbol{\eta}_1^{\otimes n-1} - \boldsymbol{\eta}_2^{\otimes n-1}\|_{\text{TV}},
 \end{aligned} \tag{B.11}$$

where the second inequality is from Lemma B.1. Similarly for the second sum,

$$\begin{aligned}
 & \sum_{\substack{\mathbf{x} \in [d+1]^m \\ n_{d+1} = n \\ x_m \neq d+1}} |\mathbf{P}_{M_{\eta_1}}(\mathbf{X} = \mathbf{x}) - \mathbf{P}_{M_{\eta_2}}(\mathbf{X} = \mathbf{x})| \\
 &= \sum_{\substack{S = (s_1, \dots, s_n) \\ S \subset [m] \\ s_n \neq m \\ i \neq j \Rightarrow |s_i - s_j| > 1}} \sum_{(x_{s_1}, \dots, x_{s_n}) \in [d+1]^n} d^{m-2n} p_\star^n \left( \frac{1-p_\star}{d} \right)^{m-2n} \left| \prod_{k=1}^n \boldsymbol{\eta}_1(x_{s_k}) - \prod_{k=1}^n \boldsymbol{\eta}_2(x_{s_k}) \right| \\
 &= \left( \binom{m-n+1}{n} - \binom{m-n}{n-1} \right) p_\star^n (1-p_\star)^{m-2n} \sum_{(x_{s_1}, \dots, x_{s_n}) \in [d]^n} \left| \prod_{k=1}^n \boldsymbol{\eta}_1(x_{s_k}) - \prod_{k=1}^n \boldsymbol{\eta}_2(x_{s_k}) \right| \\
 &= \binom{m-n}{n} p_\star^n (1-p_\star)^{m-2n} 2 \|\boldsymbol{\eta}_1^{\otimes n} - \boldsymbol{\eta}_2^{\otimes n}\|_{\text{TV}}.
 \end{aligned} \tag{B.12}$$

Hence,

$$\begin{aligned}
 & 2 \|\mathbf{P}_{M_{\eta_1}}(\mathbf{X} | N_{d+1} = n) - \mathbf{P}_{M_{\eta_2}}(\mathbf{X} | N_{d+1} = n)\|_{\text{TV}} P(m, n, p_\star) \\
 &= 2 p_\star^n (1-p_\star)^{m-2n} \left[ \binom{m-n}{n-1} (1-p_\star) \|\boldsymbol{\eta}_1^{\otimes n-1} - \boldsymbol{\eta}_2^{\otimes n-1}\|_{\text{TV}} + \binom{m-n}{n} \|\boldsymbol{\eta}_1^{\otimes n} - \boldsymbol{\eta}_2^{\otimes n}\|_{\text{TV}} \right] \\
 &\leq 2 p_\star^n \|\boldsymbol{\eta}_1^{\otimes n} - \boldsymbol{\eta}_2^{\otimes n}\|_{\text{TV}} (1-p_\star)^{m-2n} \left[ \binom{m-n}{n-1} (1-p_\star) + \binom{m-n}{n} \right] \\
 &= 2 \|\boldsymbol{\eta}_1^{\otimes n} - \boldsymbol{\eta}_2^{\otimes n}\|_{\text{TV}} P(m, n, p_\star) \text{ (Lemma B.1)}.
 \end{aligned} \tag{B.13}$$

□

**Lemma B.5 (Cover time)** For  $M \in \mathcal{H}_\eta$  [defined in (A.1)], the “half cover time” random variable  $T_{\text{CLIQ}/2}$  [defined in (A.2)] satisfies

$$m \leq \frac{d}{120\eta} \implies \mathbf{P}(T_{\text{CLIQ}/2} > m) \geq \frac{1}{5}. \tag{B.14}$$

**Proof:** The proof pursues a strategy similar to Wolfer and Kontorovich (2019), which is adapted to “half” rather than “full” coverings. Let  $M \in \mathcal{H}_\eta$  and  $M_I \in \mathcal{M}_{d/3}$  be such that  $M_I$  consists only in the inner clique of  $M$ , and each outer rim state got absorbed into its unique inner clique neighbor:

$$M_I = \begin{pmatrix} 1-\eta & \frac{\eta}{d/3-1} & \cdots & \frac{\eta}{d/3-1} \\ \frac{\eta}{d/3-1} & 1-\eta & \ddots & \vdots \\ \vdots & \ddots & \ddots & \frac{\eta}{d/3-1} \\ \frac{\eta}{d/3-1} & \cdots & \frac{\eta}{d/3-1} & 1-\eta \end{pmatrix}.$$

By construction, it is clear that  $T_{\text{CLIQ}/2}$  is almost surely greater than the half cover time of  $\mathbf{M}_I$ . The latter corresponds to a generalized coupon half collection time  $U_{\text{COVER}/2} = 1 + \sum_{i=1}^{d/6-1} U_i$  where  $U_i$  is the time increment between the  $i$ th and the  $(i+1)$ th unique visited state. Formally, if  $\mathbf{X}$  is a random walk according to  $\mathbf{M}_I$  (started from any state), then  $U_1 = \min\{t > 1 : X_t \neq X_1\}$  and for  $i > 1$ ,

$$U_i = \min\{t > 1 : X_t \notin \{X_1, \dots, X_{U_{i-1}}\}\} - U_{i-1}. \quad (\text{B.15})$$

The random variables  $U_1, U_2, \dots, U_{d/6-1}$  are independent and  $U_i \sim \text{Geometric}\left(\eta - \frac{(i-1)\eta}{d/3}\right)$ , whence

$$\mathbf{E}[U_i] = \frac{d/3}{\eta(d/3 - i + 1)}, \quad \mathbf{Var}[U_i] = \frac{1 - \left(\eta - \frac{(i-1)\eta}{d/3}\right)}{\left(\eta - \frac{(i-1)\eta}{d/3}\right)^2} \quad (\text{B.16})$$

and

$$\mathbf{E}[U_{\text{COVER}/2}] \geq 1 + \frac{d/3}{\eta}(\sigma_{d/3} - \sigma_{d/6}), \quad \mathbf{Var}[U_{\text{COVER}/2}] \leq \frac{(d/3)^2 \pi^2}{\eta^2 6}, \quad (\text{B.17})$$

where  $\sigma_d = \sum_{i=1}^d \frac{1}{i}$ , and  $\pi = 3.1416\dots$ . Since  $\ln(d+1) \leq \sigma_d \leq 1 + \ln d$ , and for  $d = 6k, k \geq 2$ , we have  $\sigma_d - \sigma_{d/2} \geq \ln 2$  it follows that

$$\mathbf{E}[U_{\text{COVER}/2}] \geq \frac{d \ln 2}{\eta 3}, \quad \mathbf{Var}[U_{\text{COVER}/2}] \leq \frac{d^2 \pi^2}{\eta^2 54}. \quad (\text{B.18})$$

Invoking the Paley-Zygmund inequality with  $\theta = 1 - \frac{\sqrt{15}}{6 \ln 2}$ , yields

$$\mathbf{P}(U_{\text{COVER}/2} > \theta \mathbf{E}[U_{\text{COVER}/2}]) \geq \left(1 + \frac{\mathbf{Var}[U_{\text{COVER}/2}]}{(1-\theta)^2 (\mathbf{E}[U_{\text{COVER}/2}])^2}\right)^{-1} \geq \frac{1}{5}, \quad (\text{B.19})$$

so that for  $m \leq \frac{d}{120\eta}$  we have  $\mathbf{P}(T_{\text{CLIQ}/2} > m) \geq \frac{1}{5}$ .  $\square$
